# Supplementary material for: Activated boron nitride as an effective adsorbent for metal ions and organic pollutants
Source: PubMed Central journal article supplement — Sci Rep. 2013 Nov 13;3:3208. doi: 10.1038/srep03208 (PMC3826095; doi:10.1038/srep03208), 2013-11-13
Supplement: srep03208-s1.pdf [file srep03208-s1.pdf]

## Supplementary Information

### Activated boron nitride as an effective adsorbent for metal ions and organic pollutants

Jie Li<sup>1</sup>, Xing Xiao<sup>1</sup>, Xuewen Xu<sup>1</sup>, Jing Lin<sup>1\*</sup>, Yang Huang<sup>2</sup>, Yanming Xue<sup>1</sup>, Peng Jin<sup>1</sup>, Jin Zou<sup>2</sup> and Chengchun Tang<sup>1\*</sup>

<sup>1</sup>School of Materials Science and Engineering, Hebei University of Technology, Tianjin 300130, PR China, <sup>2</sup>Materials Engineering and Centre for Microscopy and Microanalysis, The University of Queensland, QLD 4072, Australia

e-mail: [tangcc@hebut.edu.cn](mailto:tangcc@hebut.edu.cn) (C.C. Tang); [dr.linjing@gmail.com](mailto:dr.linjing@gmail.com) (J. Lin)

The DTA and TG curves are recorded from the precursor in flowing nitrogen, as illustrated in Figure S1. The first continuous weight loss occurs up to ~120 °C with an endothermic peak centered at ~162 °C. The step shows a large weight loss of ~21.6% ranging from 120 to 202 °C. The other two endothermic peaks centered at 550 and 1082 °C corresponds to the larger weight loss. Furthermore, the total weight loss of 77.6 % could be documented from 120 to 1080 °C for the precursor. This further reveals that the heating temperature dramatically influences the final products.

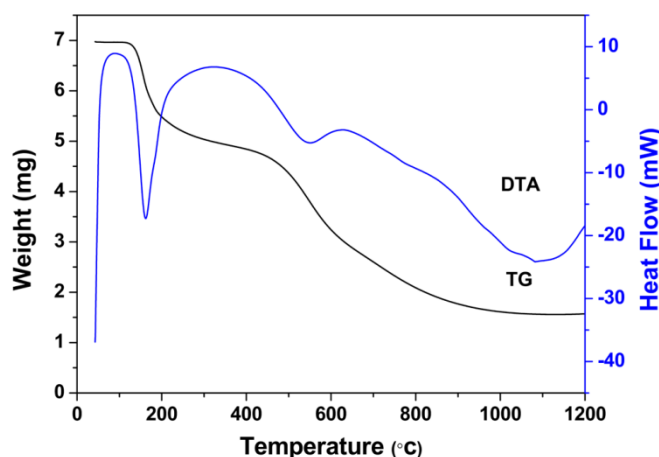

Figure S1 TG and DTA of the MBN precursor performed in an inert nitrogen atmosphere. Temperature step: 10 °C /min
